# Supplementary material for: Soluble Epoxide Hydrolase Inhibitory Constituents from the Heartwood of Toxicodendron vernicifluum: Isolation, Kinetic Characterization, Molecular Modeling, and Quantitative Analysis
Source: Research Square preprint supplement (doi:10.21203/rs.3.rs-8274523/v1), 2025-12-15
Supplement: Supplementary file 1 [file 762675faf347894dae107ceb.docx]

**Soluble Epoxide Hydrolase Inhibitory Constituents from the Heartwood of *Toxicodendron vernicifluum*: Isolation, Kinetic Characterization, Molecular Modeling, and Quantitative Analysis**

Jang Hoon Kim1, Jae-Young Cheon2, Jin Yu1, Yong-Goo Kim1, Sung Yeon Kim1, Kyong-Hwan Bang1, Jin Tae Jeong1, Hyun-Ju Jung2,***, Ik Soo Lee3,*

1Department of Herbal Crop Research, National Institute of Horticultural & Herbal Science, RDA, Eumsung, Chungbuk, 27709, Republic of Korea

2Department of Oriental Pharmacy and Wonkwang-Oriental Medicines Research Institute, Wonkwang University, Sinyong-dong, Iksan 570-749, Republic of Korea

3Km Covergence Research Division, Korea Institute of Oriental Medicine, Daejeon, 34054, Republic of Korea

*Co-corresponding authors

[knifer48@kiom.re.kr(I.S](mailto:knifer48@kiom.re.kr(I.S). Lee), Tel.: +82-42-868-9462, Fax: +82-42-868-9471

hyun104@wku.ac.kr, Tel.: +82-63-850-6814, Fax: +82-63-850-6814

[M+H]+


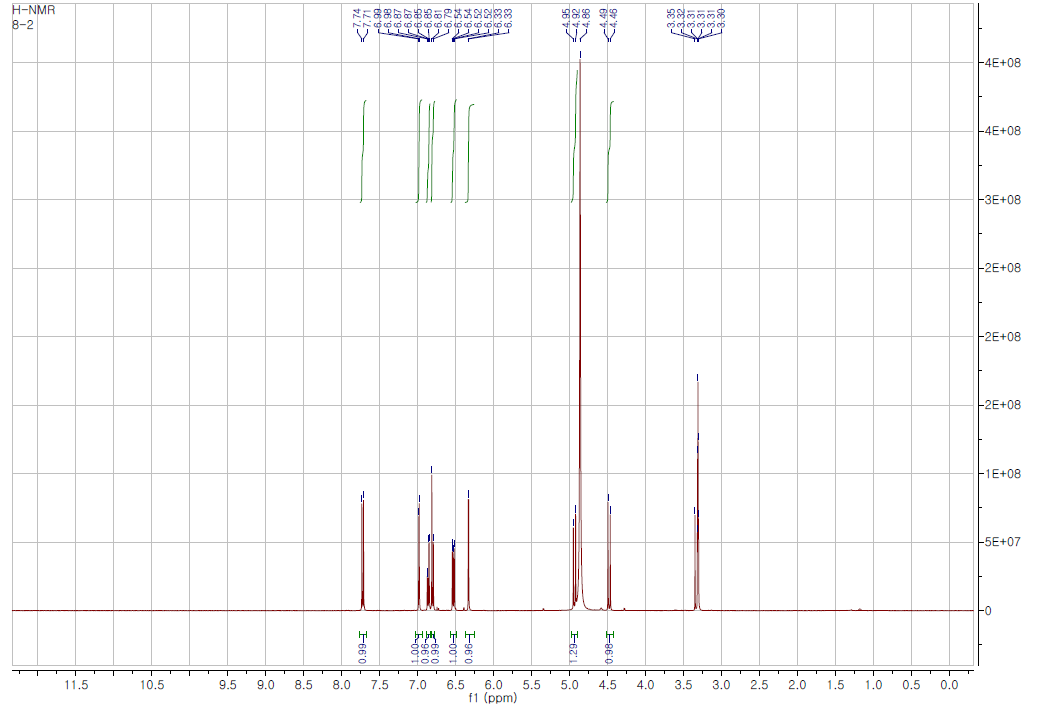


1H-NMR


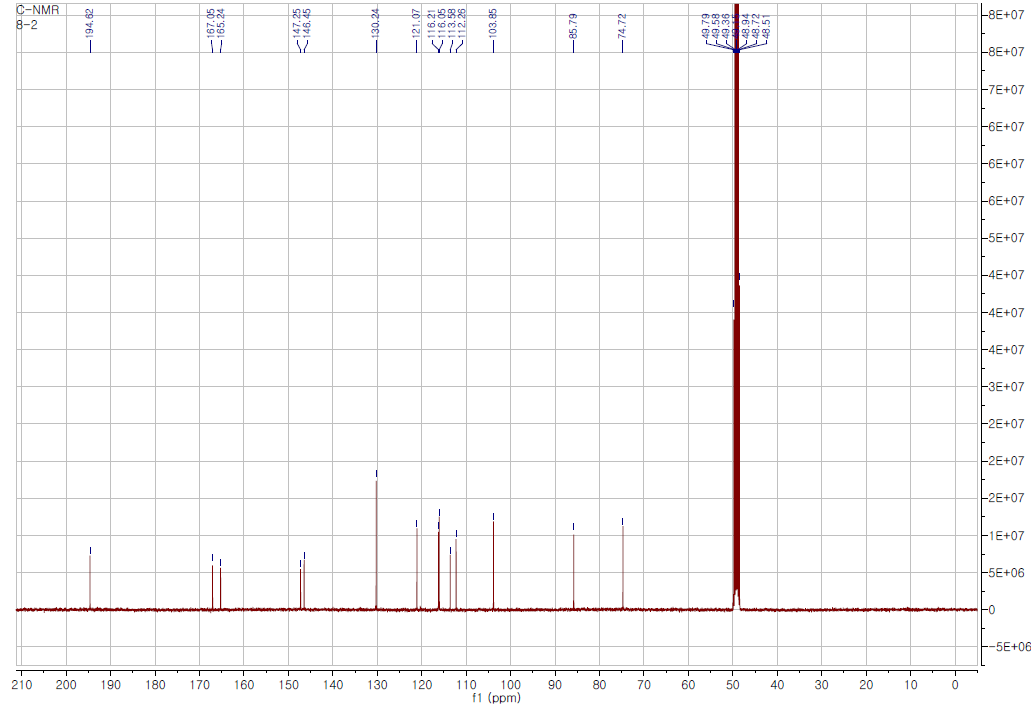


13C-NMR

Figure S1. Mass and 1H-/ 13C-NMR spectra of compound **1** (300MHz, MeOD-*d*4)


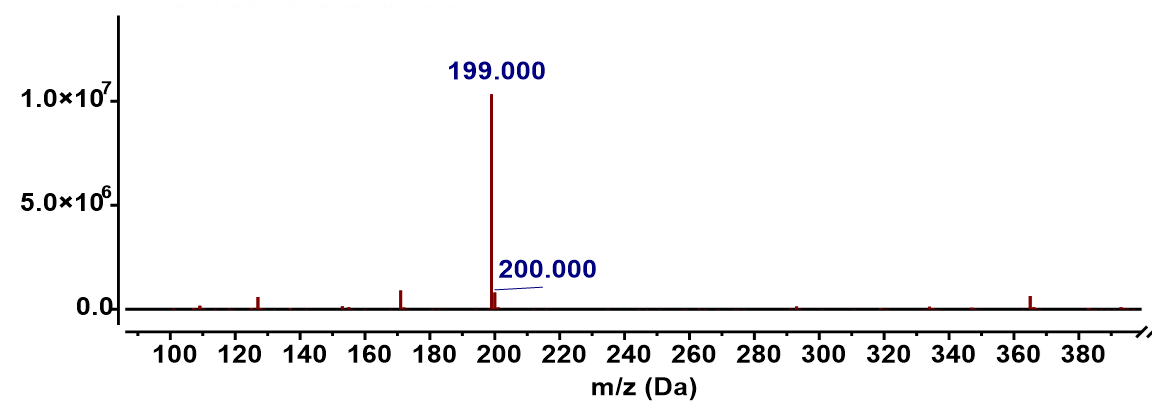


[M+H]+


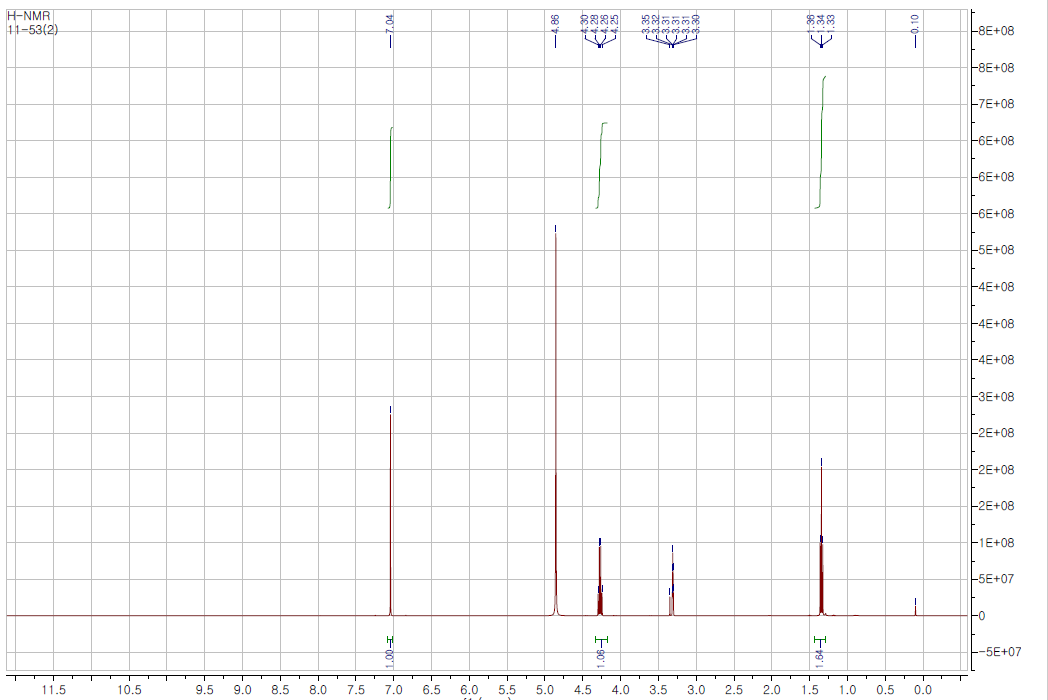


1H-NMR


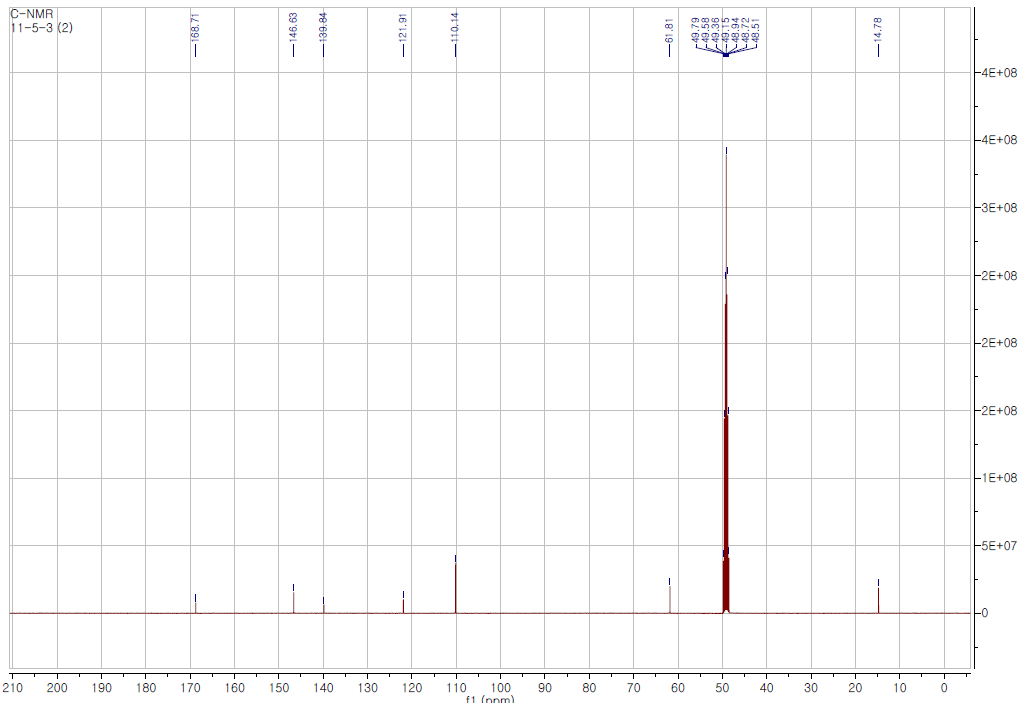


13C-NMR

Figure S2. Mass and 1H-/ 13C-NMR spectra of compound **2** (300MHz, MeOD-*d*4)


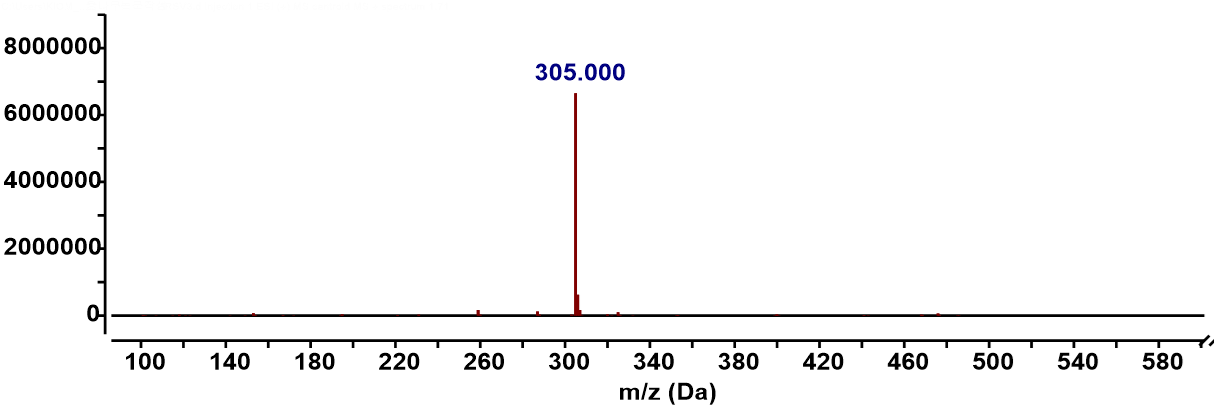


[M+H]+


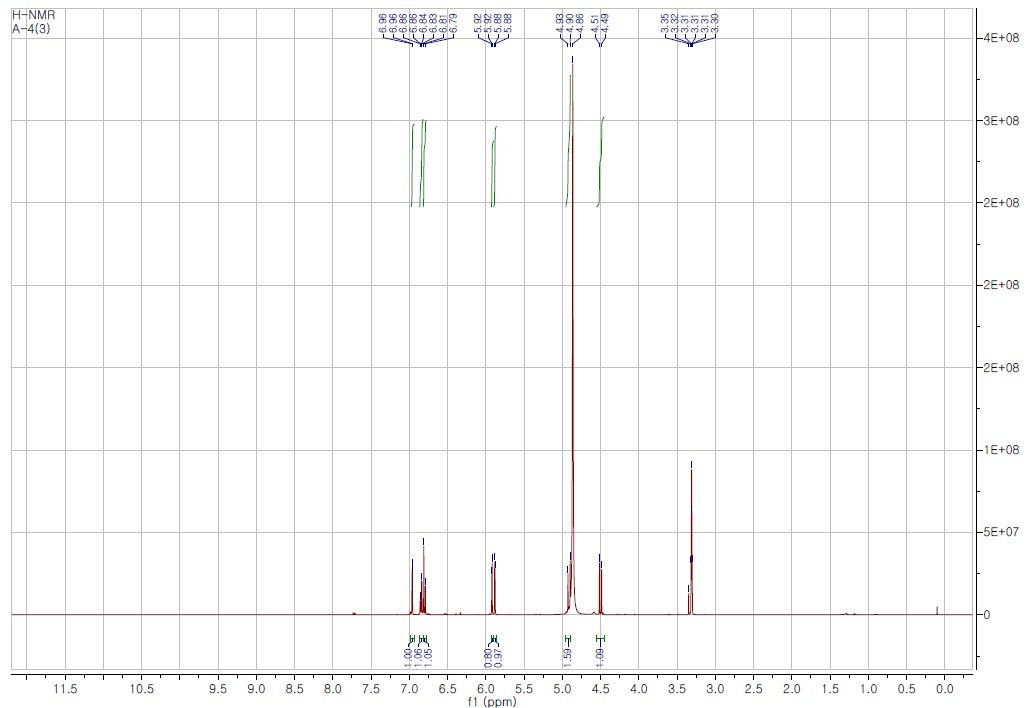


1H-NMR


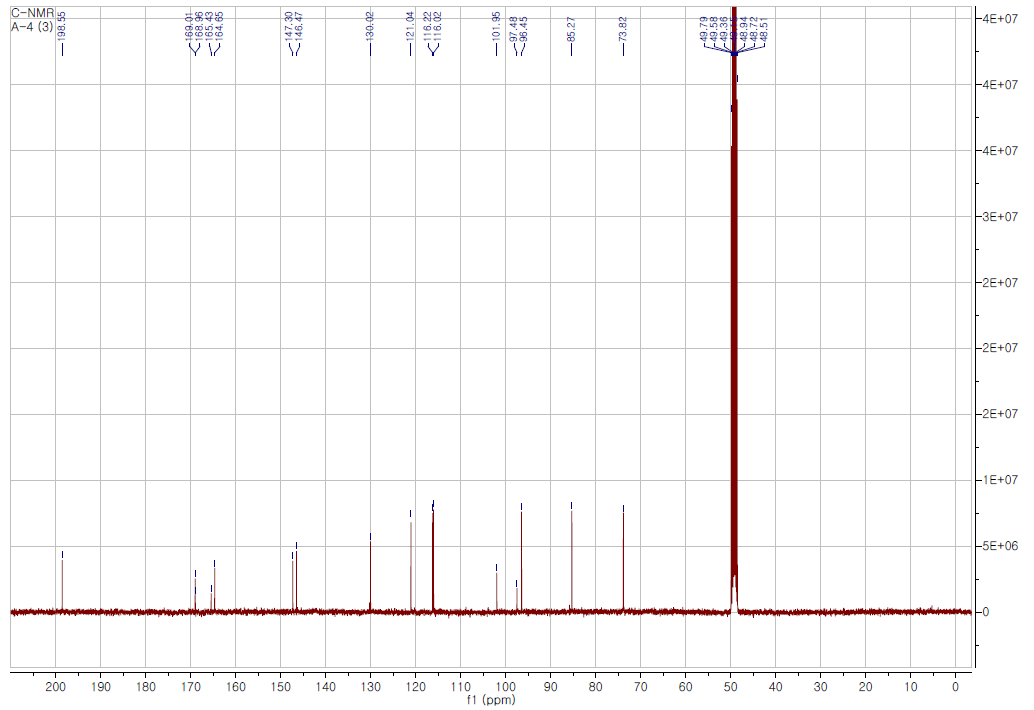


13C-NMR

Figure S3. Mass and 1H-/ 13C-NMR spectra of compound **3** (300MHz, MeOD-*d*4)


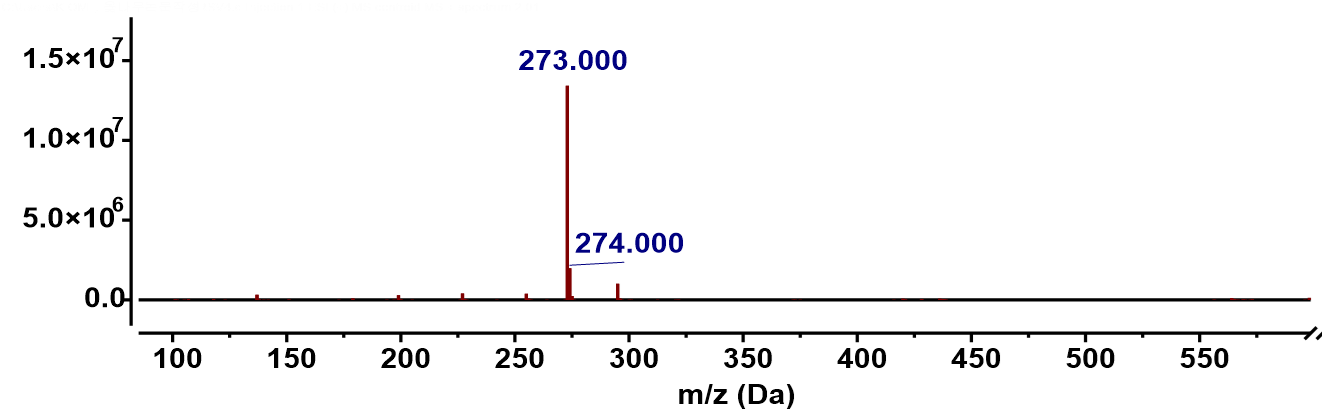


[M+H]+


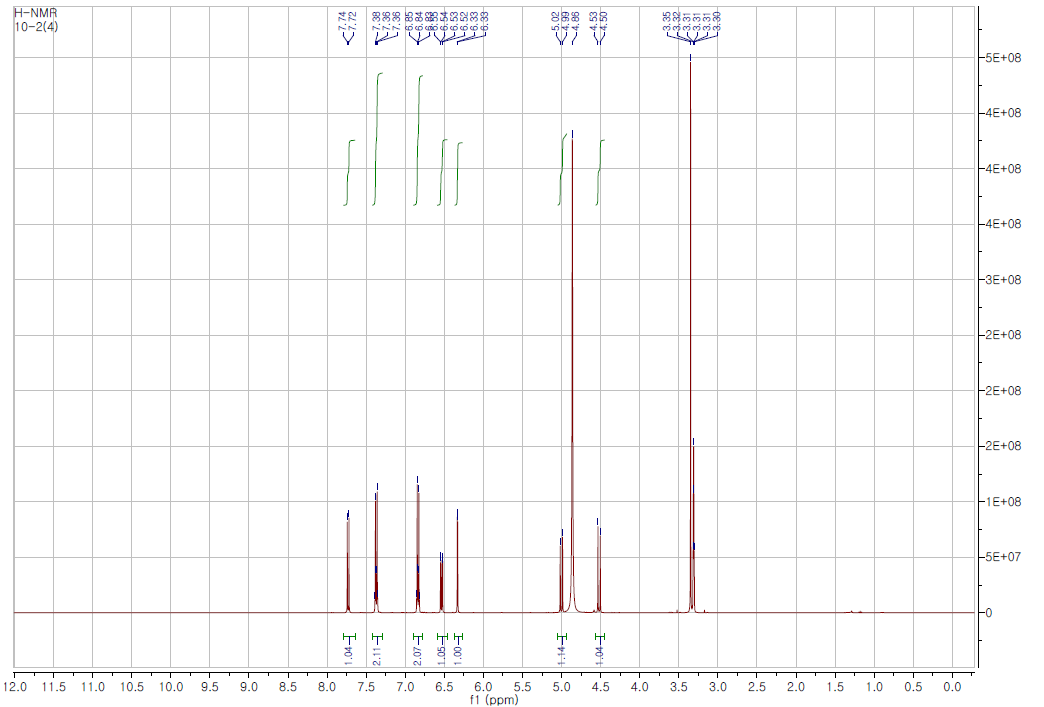


1H-NMR


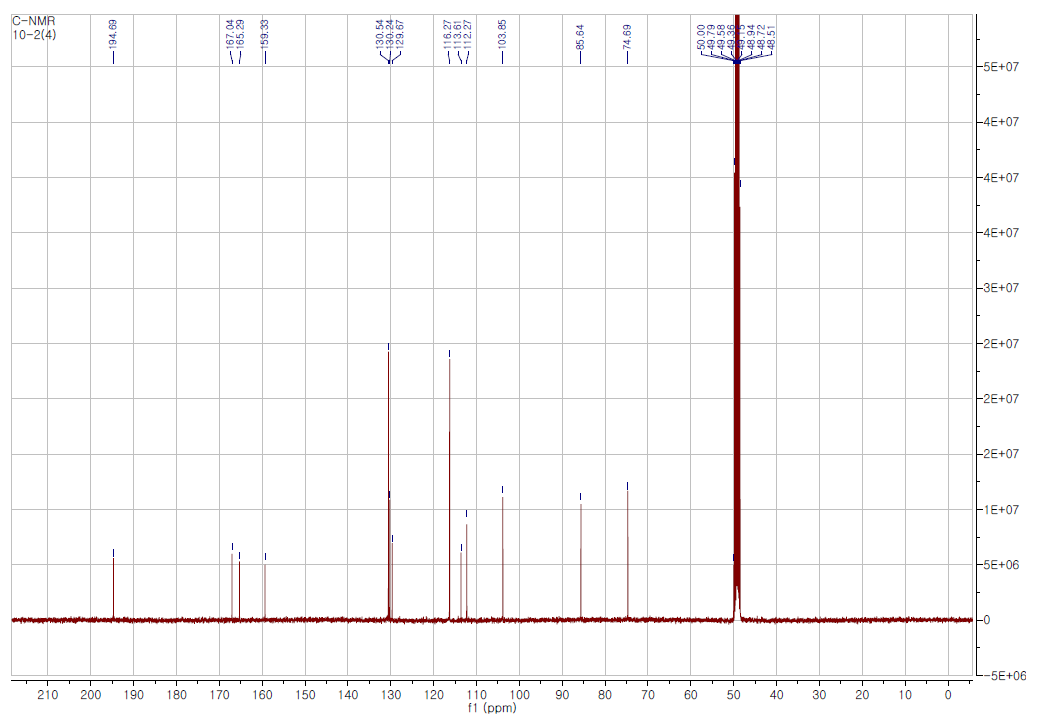


13C-NMR

Figure S4. Mass and 1H-/ 13C-NMR spectra of compound **4** (300MHz, MeOD-*d*4)


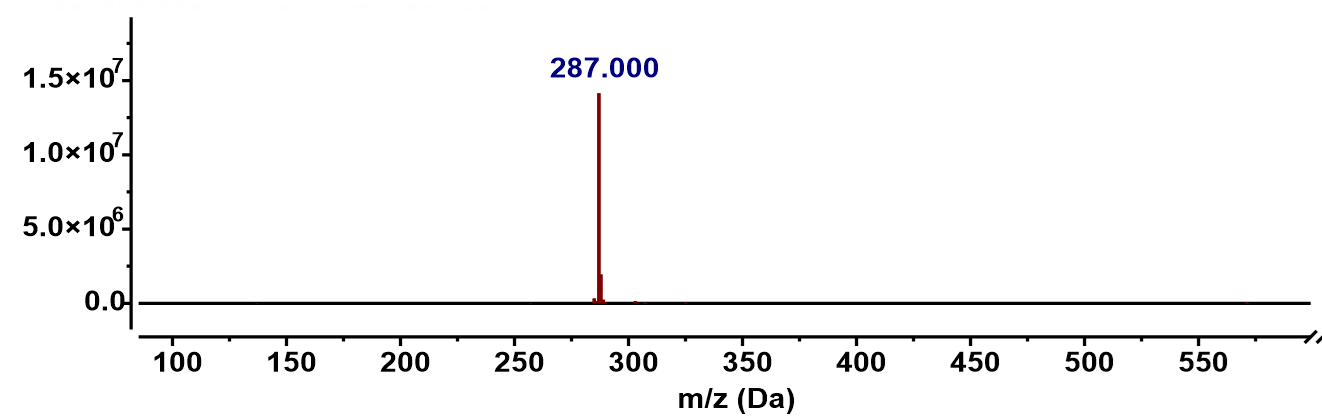


[M+H]+


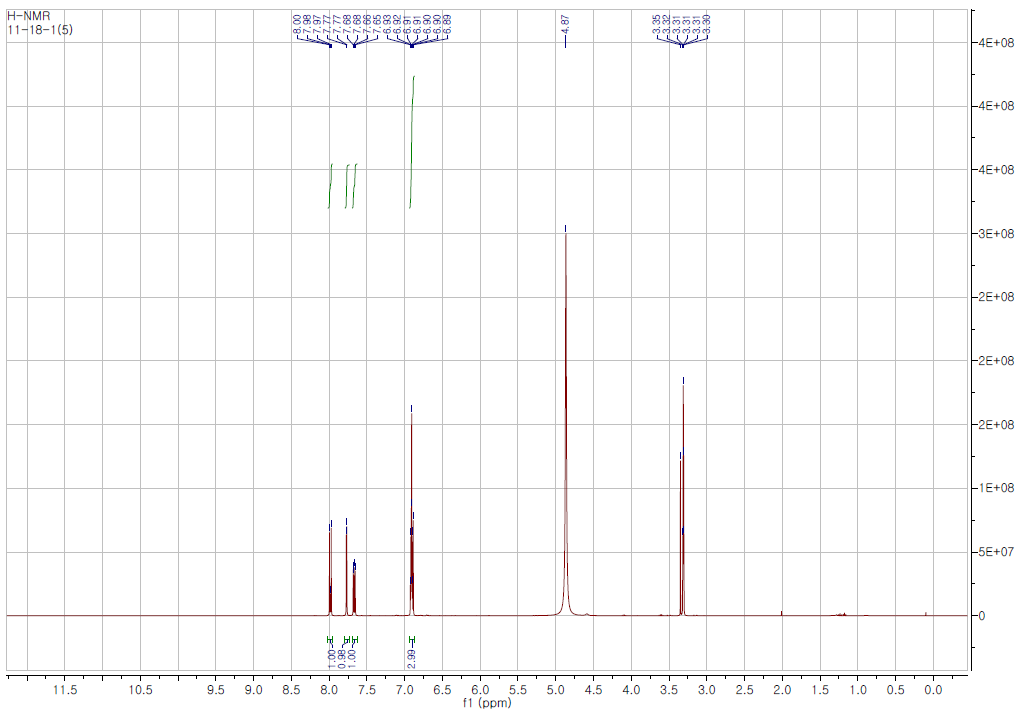


1H-NMR


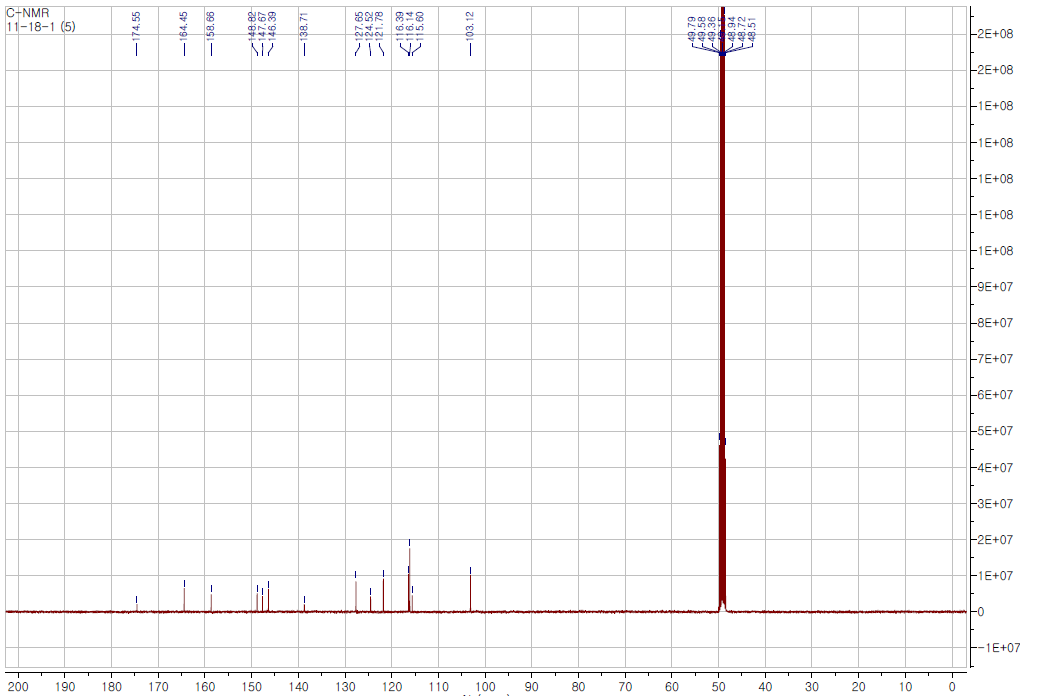


13C-NMR

Figure S5. Mass and 1H-/ 13C-NMR spectra of compound **5** (300MHz, MeOD-*d*4)


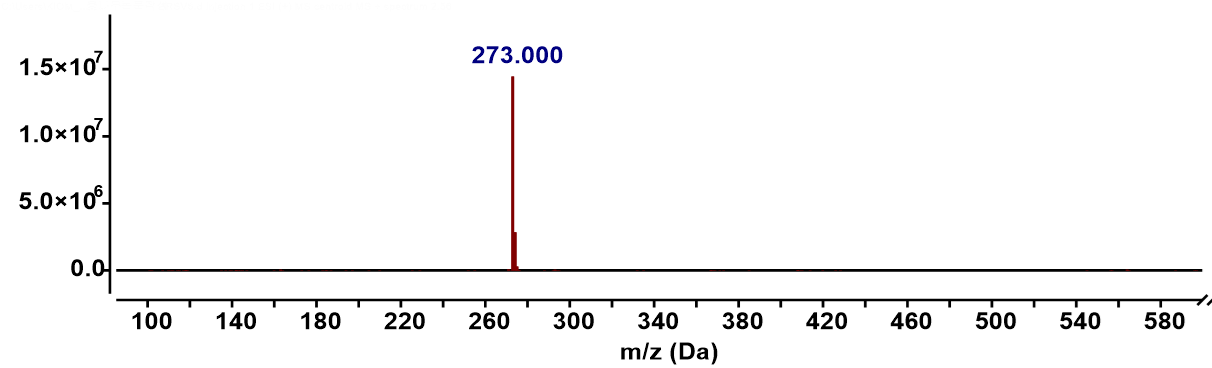


[M+H]+


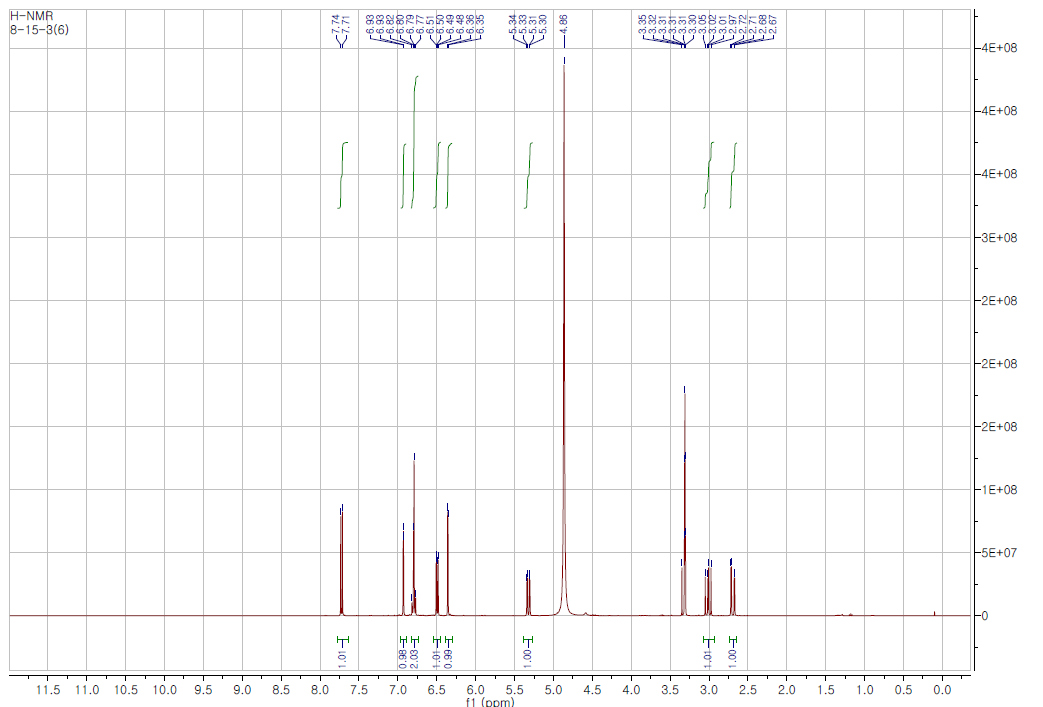


1H-NMR


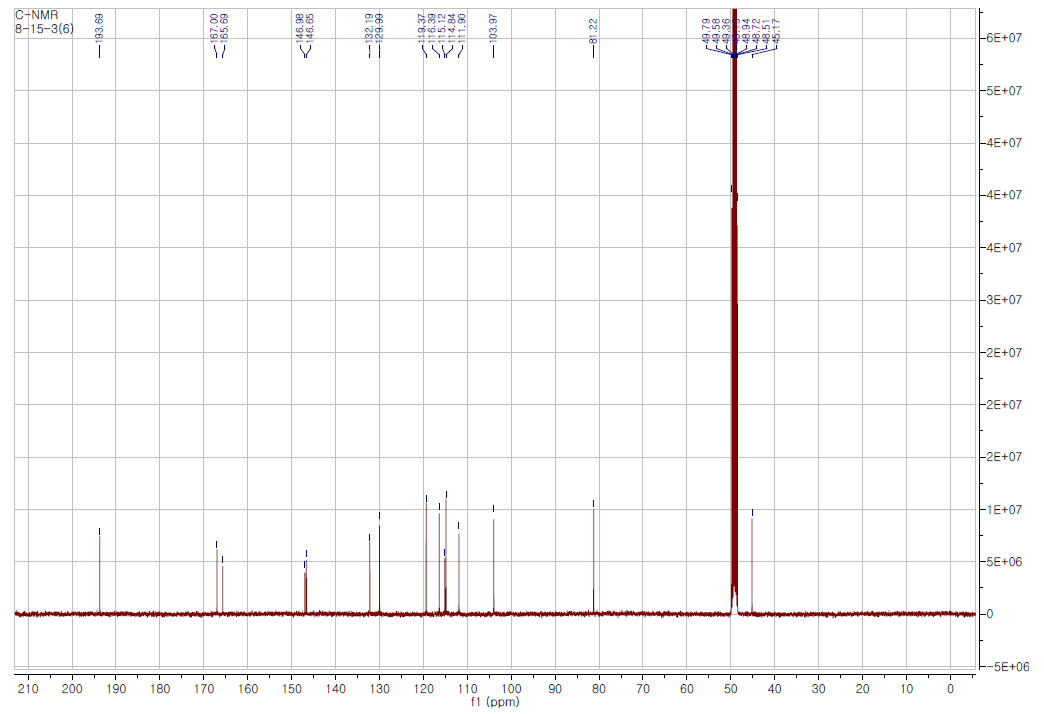


13C-NMR

Figure S6. Mass and 1H-/ 13C-NMR spectra of compound **6** (300MHz, MeOD-*d*4)


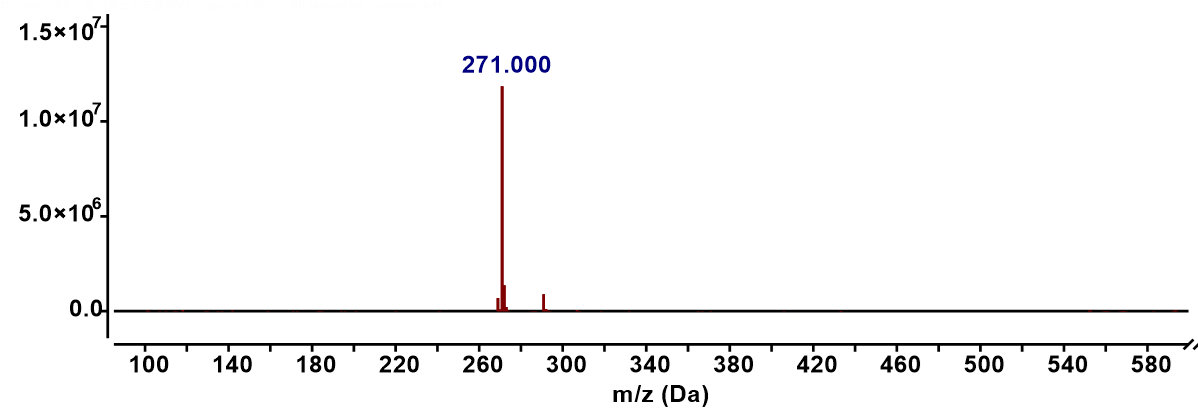


[M+H]+


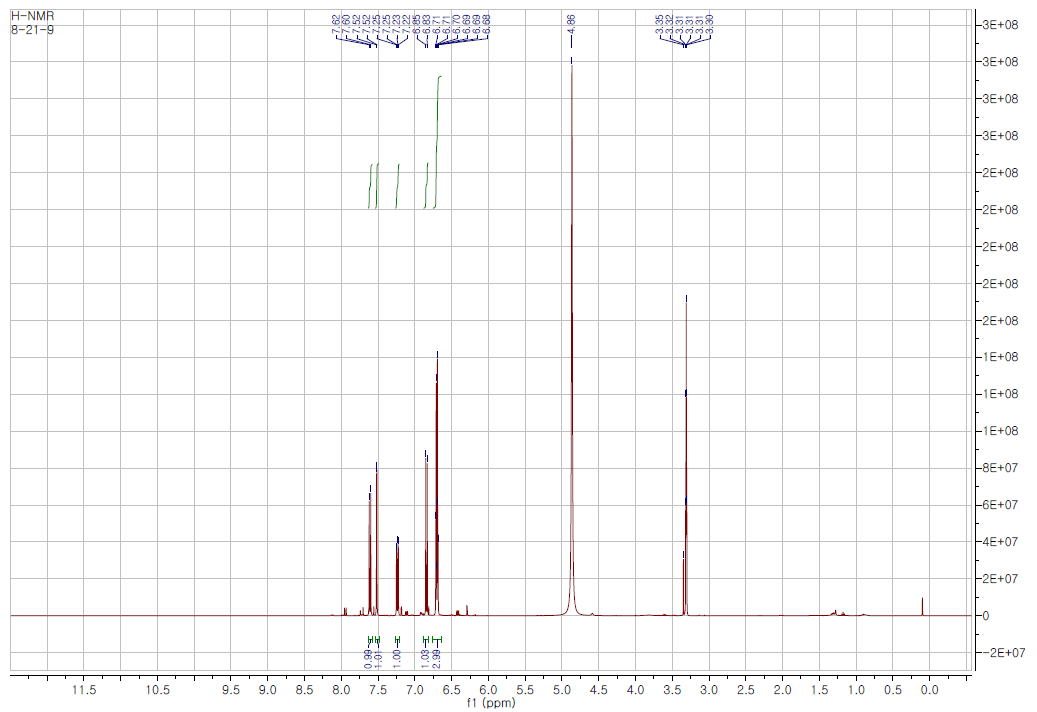


1H-NMR


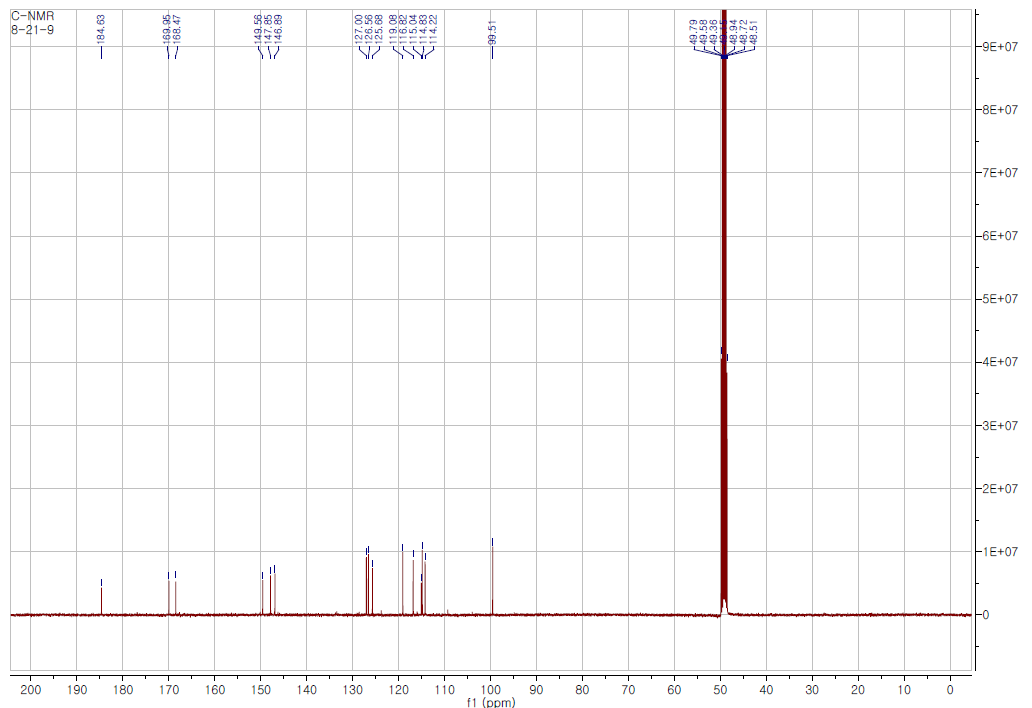


13C-NMR

Figure S7. Mass and 1H-/ 13C-NMR spectra of compound **7** (300MHz, MeOD-*d*4)


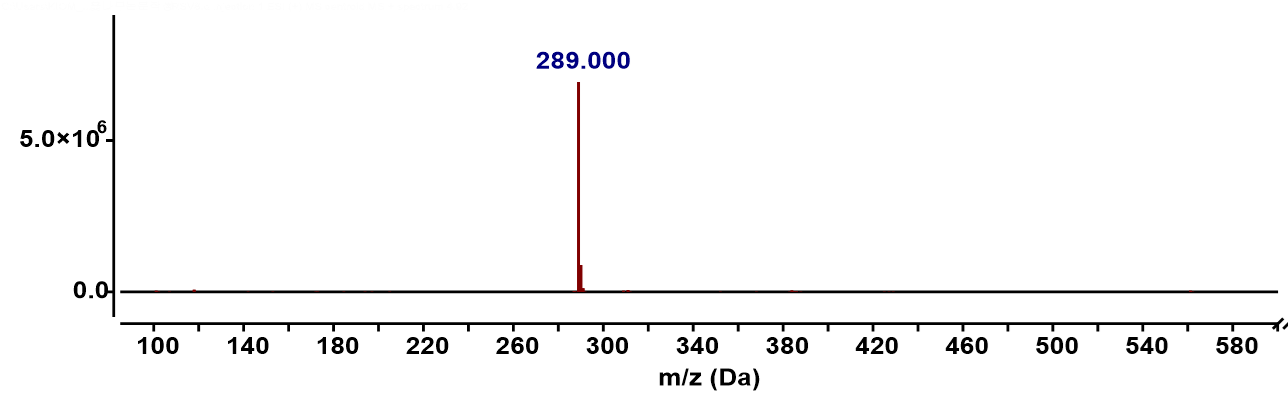


[M+H]+


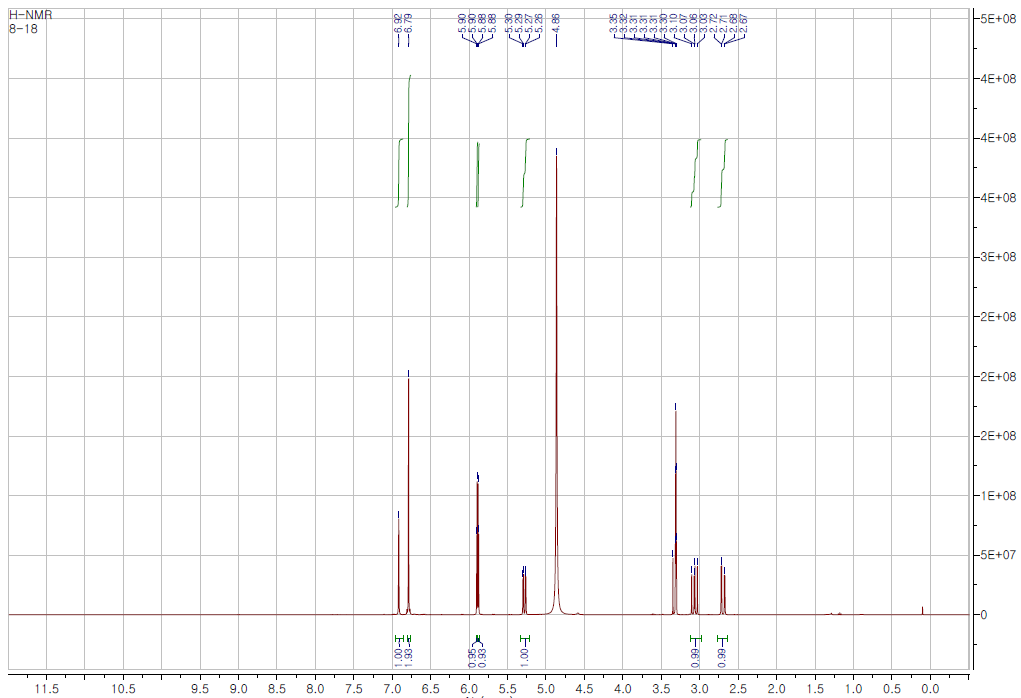


1H-NMR


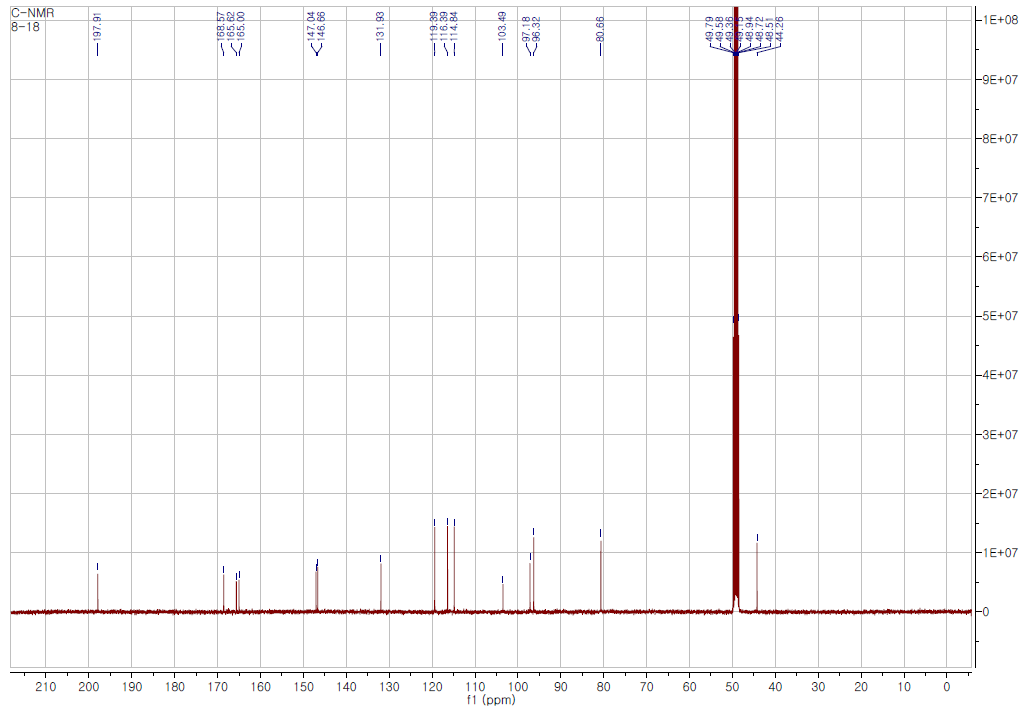


13C-NMR

Figure S8. Mass and 1H-/ 13C-NMR spectra of compound **8** (300MHz, MeOD-*d*4)


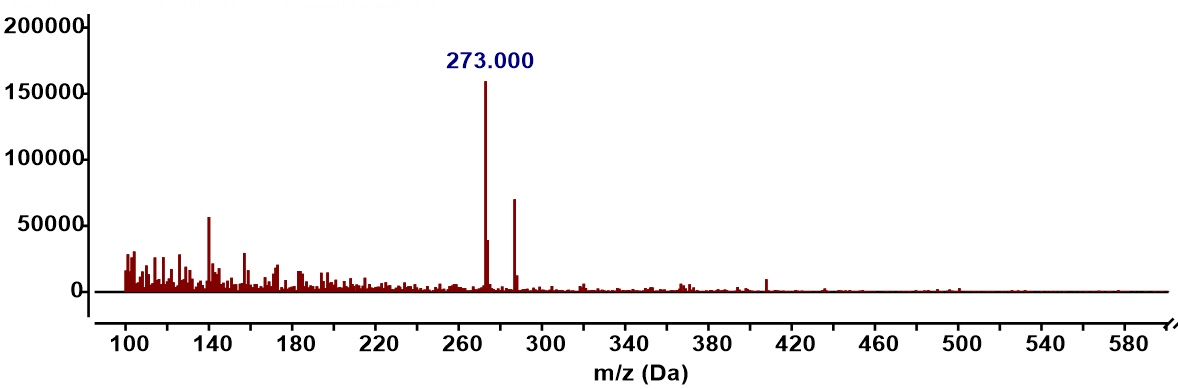


[M+H]+


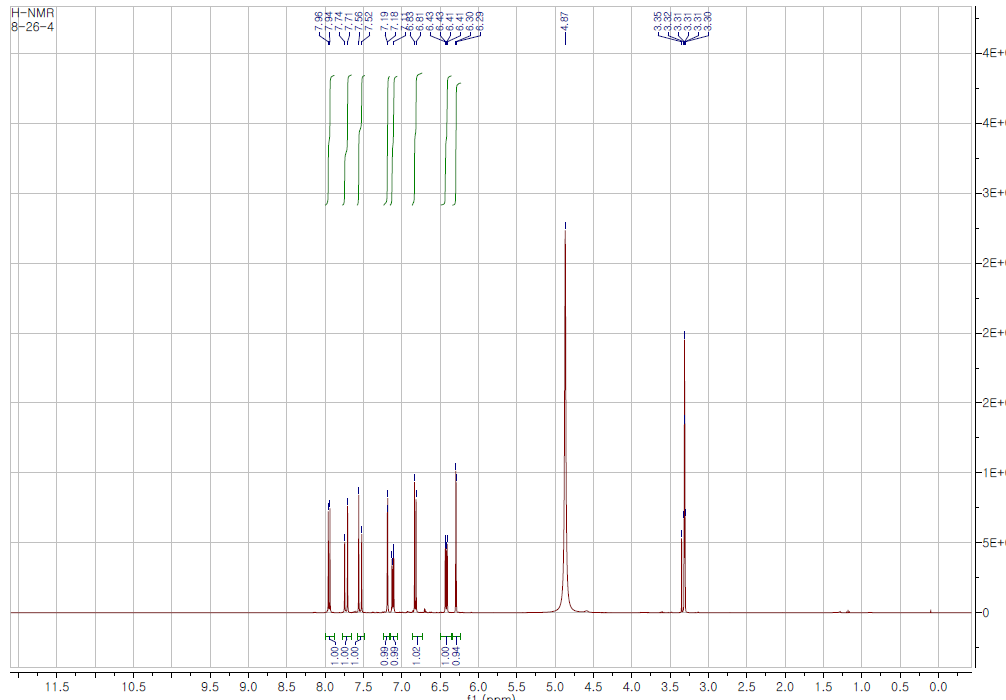


1H-NMR


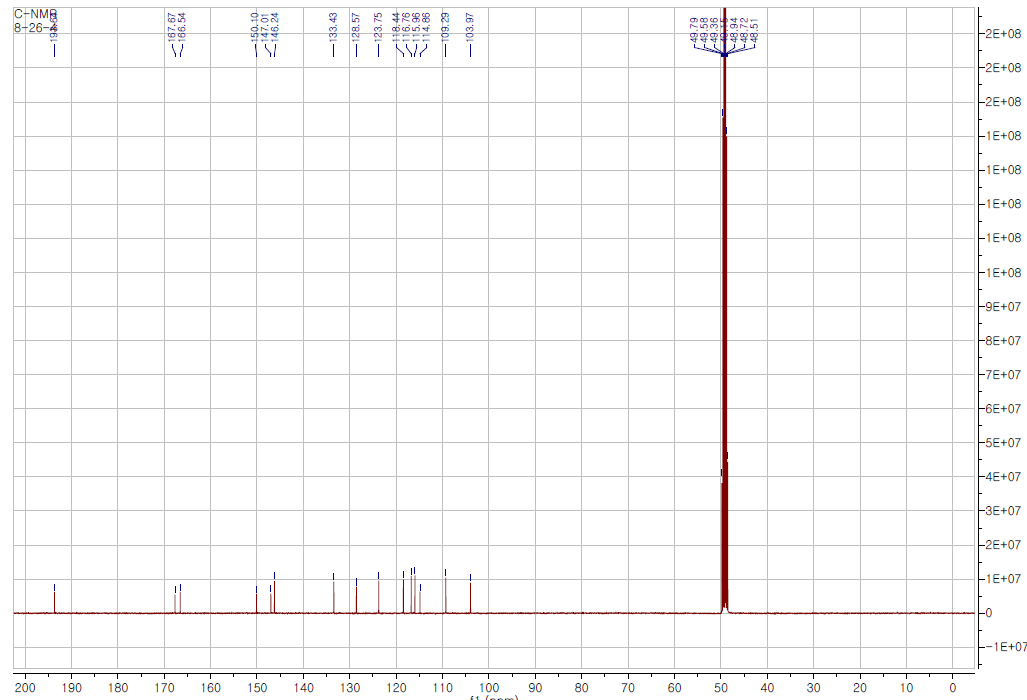


13C-NMR

Figure S9. Mass and 1H-/ 13C-NMR spectra of compound **9** (300MHz, MeOD-*d*4)


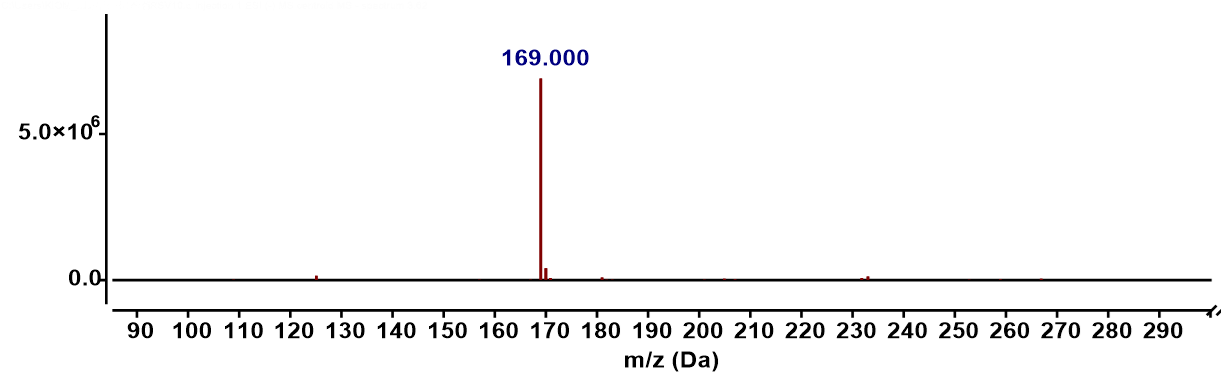


[M–H]–


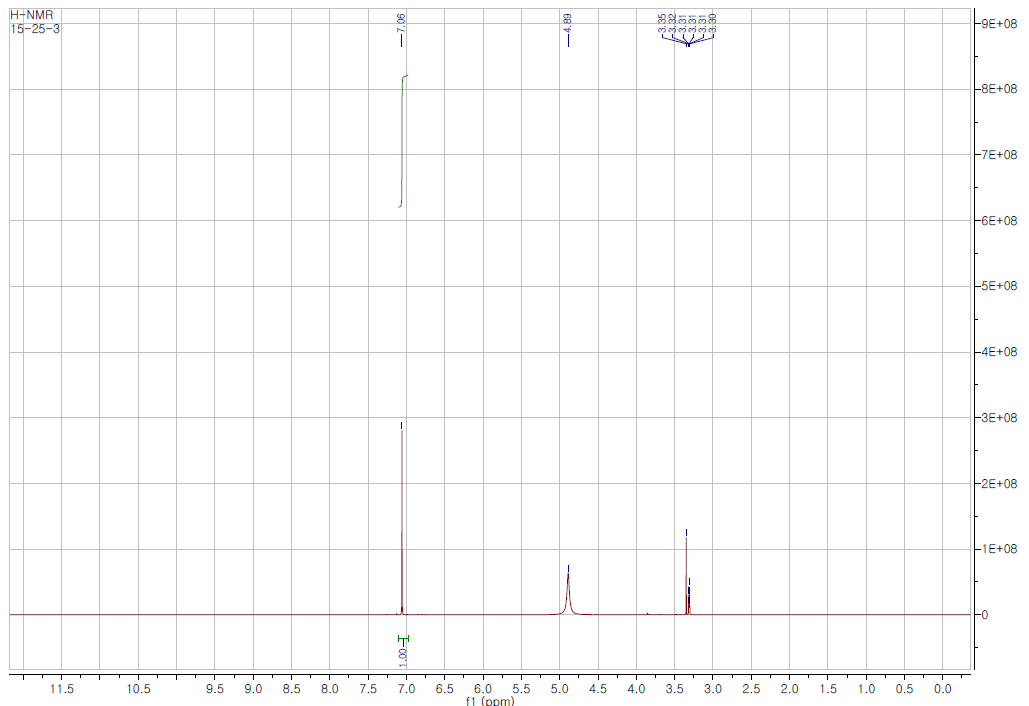


1H-NMR


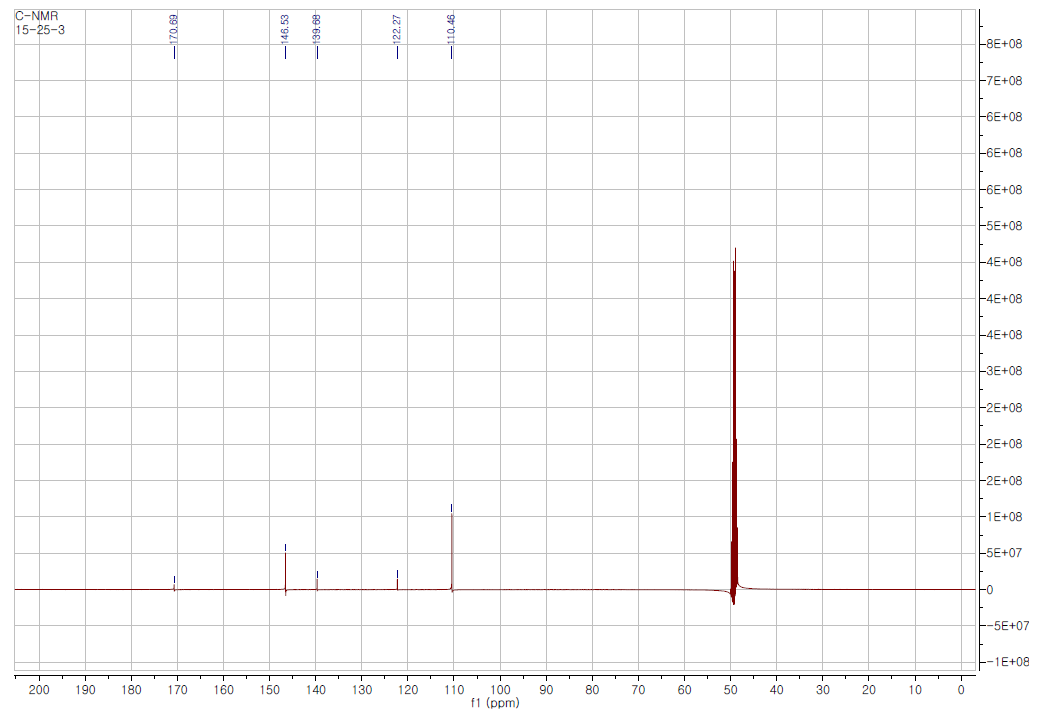


13C-NMR

Figure S10. Mass and 1H-/ 13C-NMR spectra of compound **10** (300MHz, MeOD-*d*4)


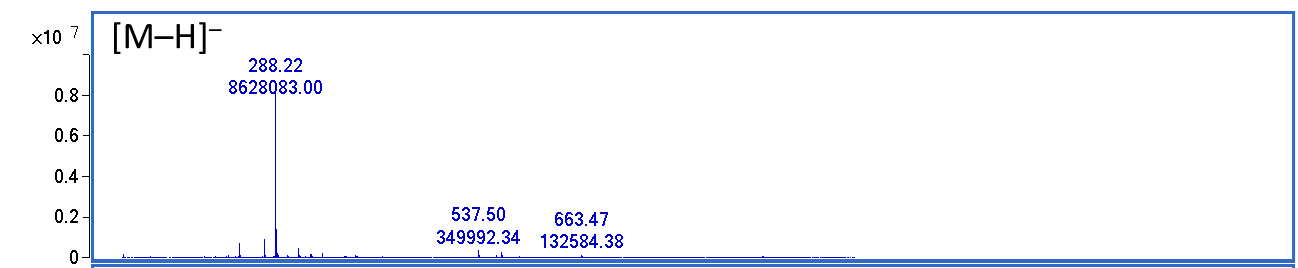


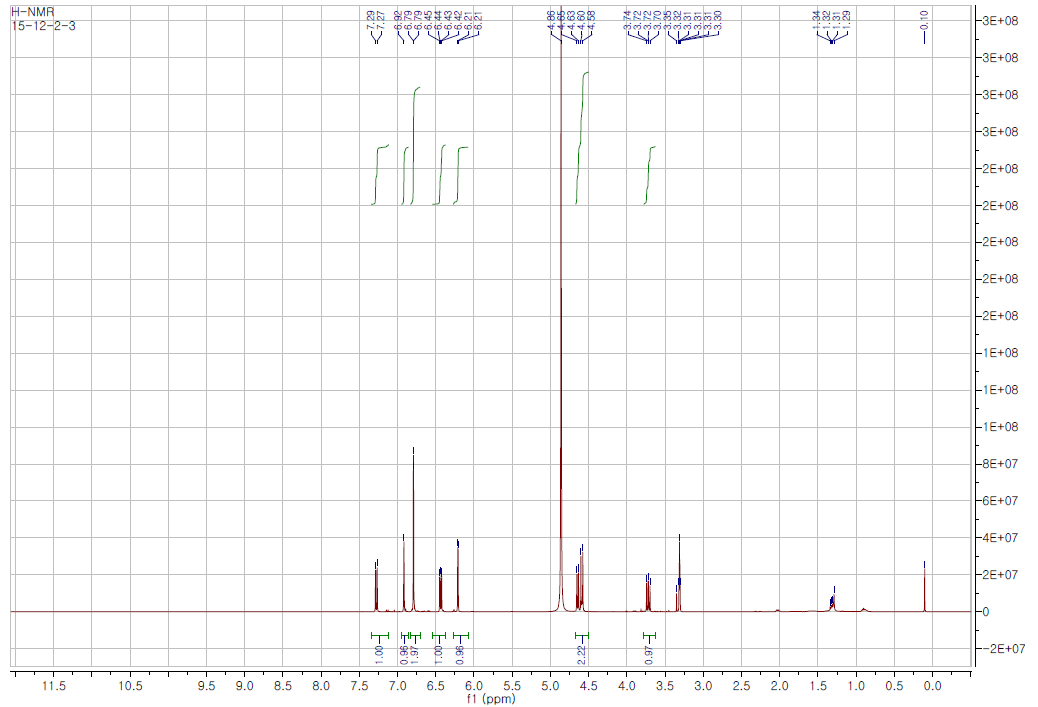


1H-NMR


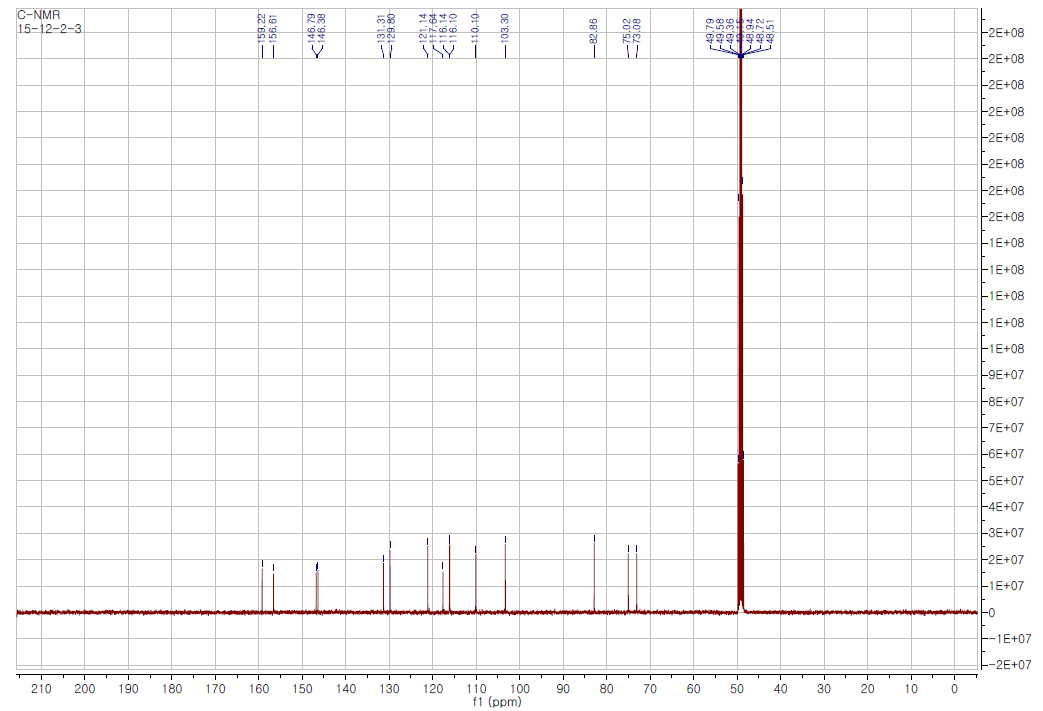


13C-NMR

Figure S11. Mass and 1H-/ 13C-NMR spectra of compound **11** (300MHz, MeOD-*d*4)
